# Supplementary material
Source: PubMed Central journal article supplement (PMC1887556)

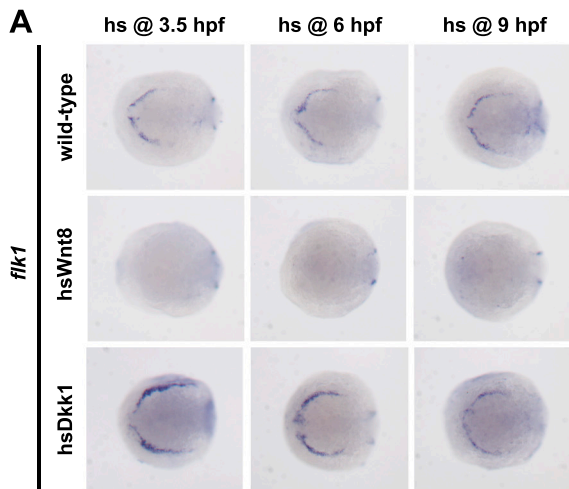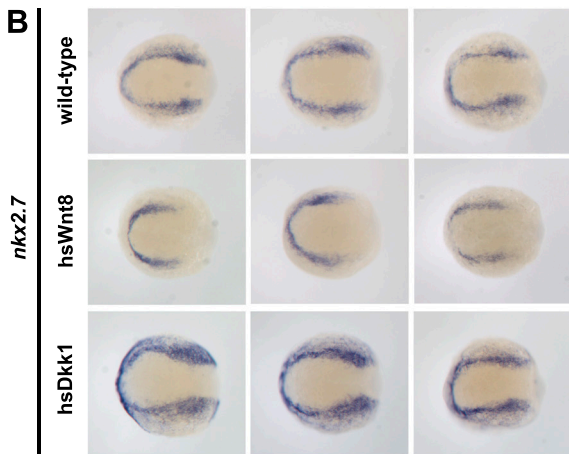

Supplement: pnas_0702859104_1.pdf [file pnas_0702859104_1.pdf]

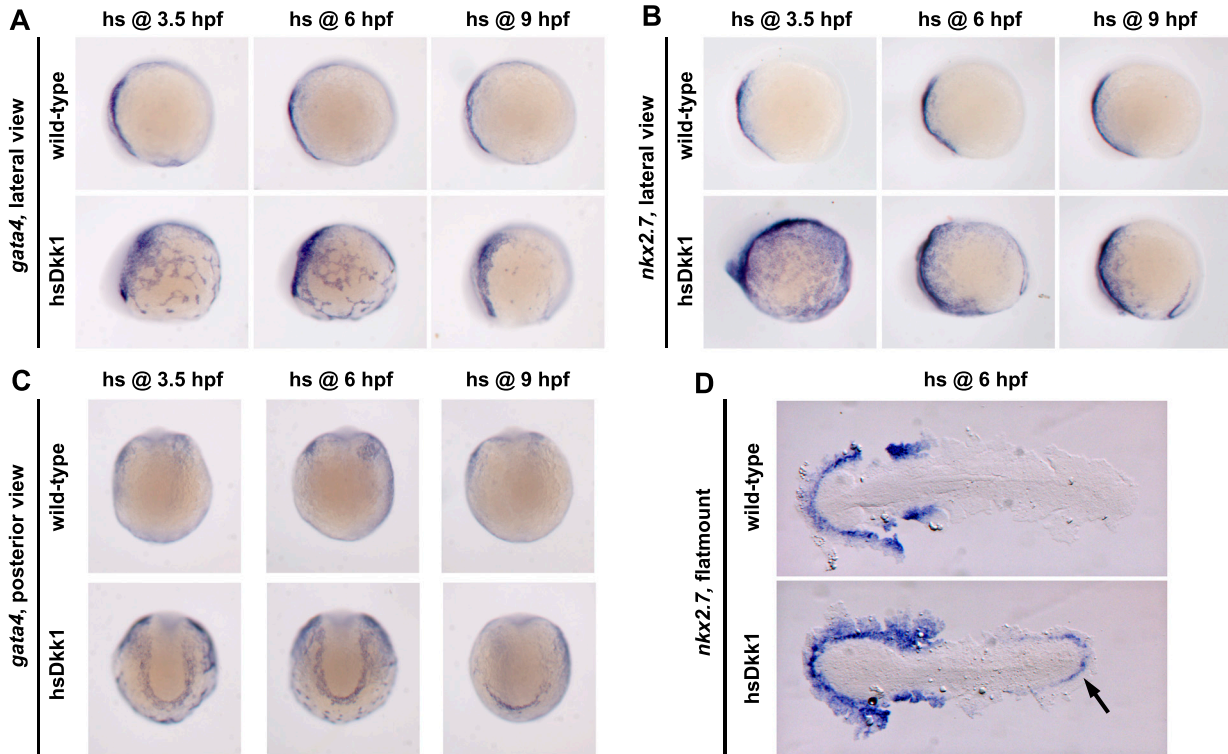

Supplement: pnas_0702859104_2.pdf [file pnas_0702859104_2.pdf]

wild-type,  
8 somite stage

red: *pu.1*, blue: *nkx2.5*

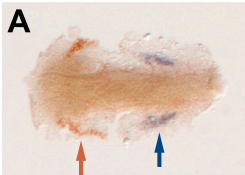

red: *pax2.1*, blue: *nkx2.5*

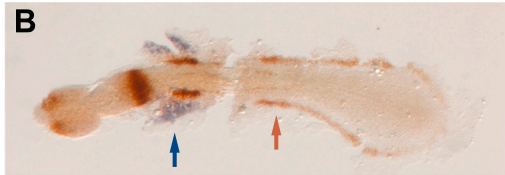

Supplement: pnas_0702859104_3.pdf [file pnas_0702859104_3.pdf]
